# Supplementary material for: A novel system for spatial and temporal imaging of intrinsic plant water use efficiency
Source: PubMed Central journal article supplement (PMC3830482; doi:10.1093/jxb/ert288), 2013-09-16

A novel system for spatial and temporal imaging of intrinsic plant water use efficiency.

McAusland L, Davey PA, Kanwal N<sup>1</sup>, Baker NR, Lawson T\*.

School of Biological Sciences, <sup>1</sup>School of Computing and Engineering Science, University of Essex, Wivenhoe Park, Colchester, Essex, CO4 3SQ, UK.

### Supplementary Data

**Figure S1:** Pixel value distributions for images of CO<sub>2</sub> assimilation (a and d), stomatal conductance (b and e) and *WUE<sub>i</sub>* (c and f) for a single WT (black) and OST mutant (grey) at 20min (T<sub>20</sub>) and at 35min (T<sub>35</sub>) under 200 μmol m<sup>-2</sup> s<sup>-1</sup> PPFD (see also Figure 6). For ease of reading, every other x-axis value has been labelled.

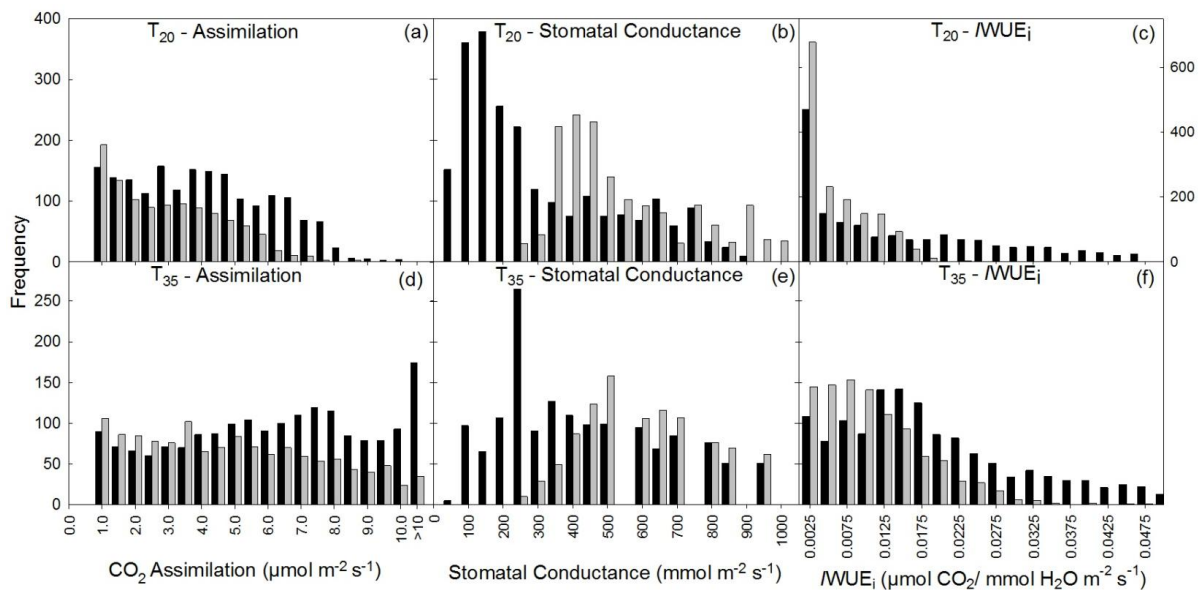

**Figure S2:** Pixel value distributions for images of CO<sub>2</sub> assimilation (a), stomatal conductance (b) and WUE<sub>i</sub> (c) for a single plant during a step-wise increase in PPFD (see also Figures 8 and 9). Data from images of *A*, *g<sub>s</sub>* and WUE<sub>i</sub> were extracted after 9 minutes at 200 μmol m<sup>-2</sup> (black) and after 30 minutes during 800 μmol m<sup>-2</sup> s<sup>-1</sup> PPFD (grey).

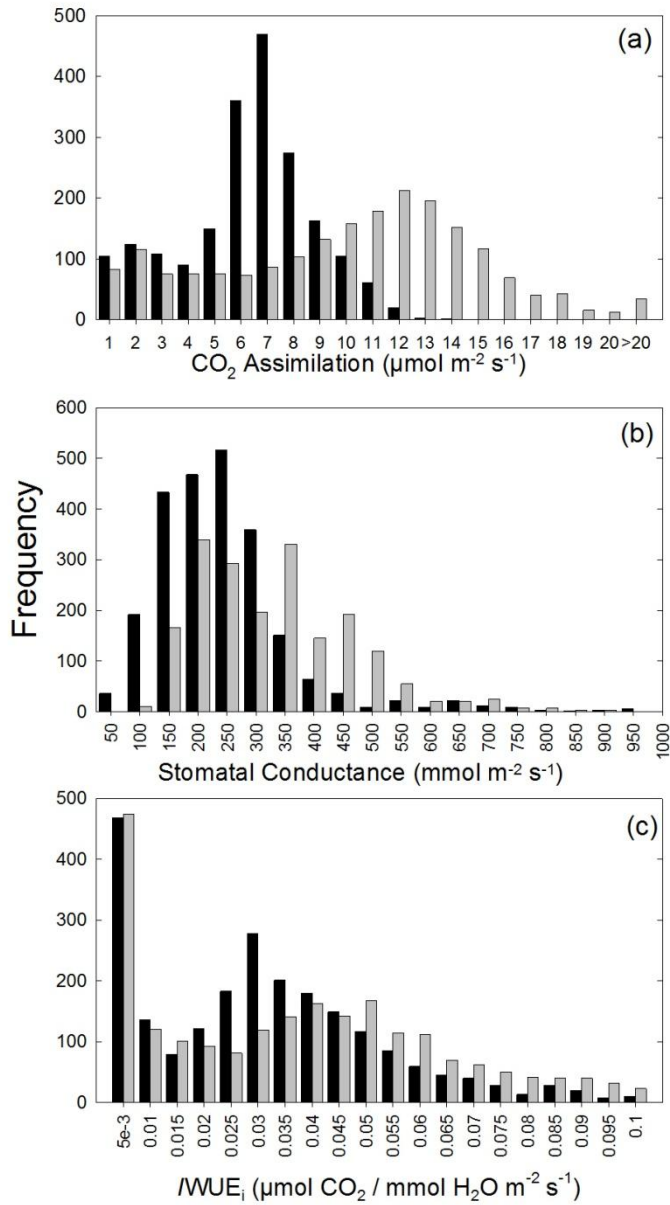

Supplement: supp_ert288_jexbot102889_file001.pdf [file supp_ert288_jexbot102889_file001.pdf]
